# Supplementary material
Source: Springer Nature journal article supplement (https://www.springermedizin.de/resource/supplementary/13054_2011_9620_MOESM2_ESM.pdf/9706584)

(A)

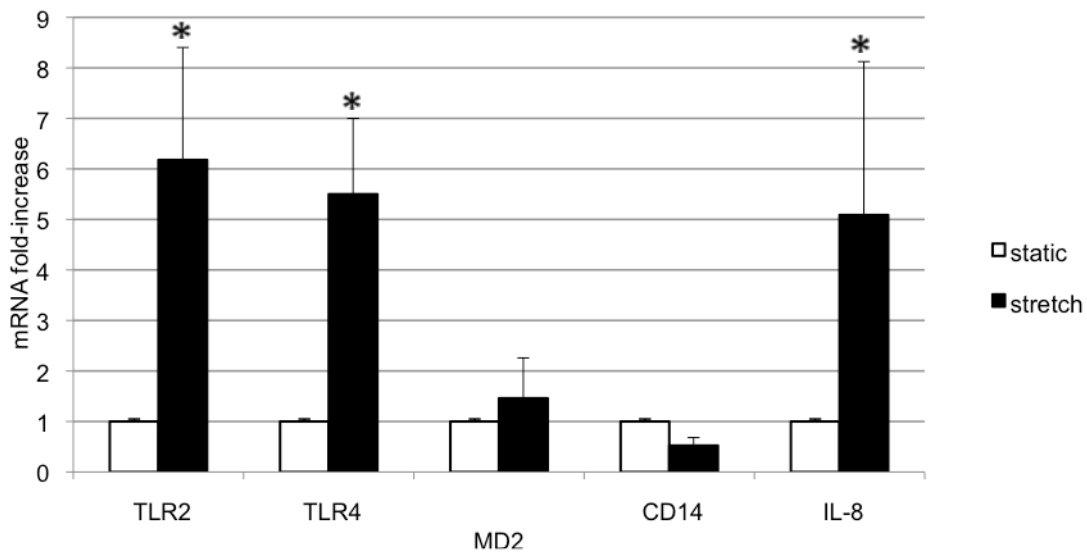

(B)

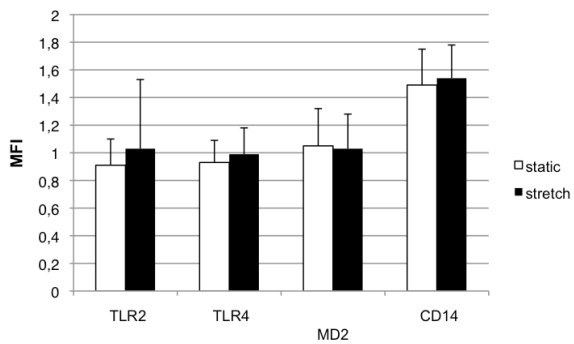

(C)

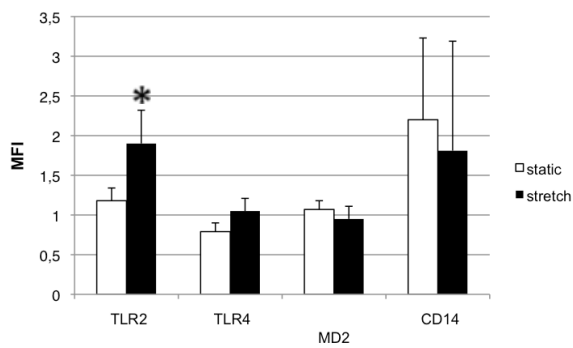

Supplement: MOESM2 [file 9706584]
